# Supplementary material for: How does the solvent composition influence the transport properties of electrolyte solutions? LiPF6 and LiFSA in EC and DMC binary solvent
Source: Royal Society of Chemistry journal article supplement (doi:10.1039/d1cp00967b), 2021-01-01
Supplement: d1cp00967b1.pdf [file d1cp00967b1.pdf]

Supporting Information for

# How does the solvent composition influence the transport properties of electrolyte solutions?—LiPF<sub>6</sub> and LiFSA in EC and DMC binary solvent

Satoshi Uchida and Tetsu Kiyobayashi

## S 1 Numerical data

Table S I: Density,  $\rho$ , of the solvent without solute and of the 1.0 mol kg<sup>-1</sup> LiPF<sub>6</sub> and the LiFSA solution at  $T/K = 298$

| Solvent         |                         | LiPF <sub>6</sub> |                         | LiFSA           |                         |
|-----------------|-------------------------|-------------------|-------------------------|-----------------|-------------------------|
| $x_{\text{EC}}$ | $\rho/\text{g cm}^{-3}$ | $x_{\text{EC}}$   | $\rho/\text{g cm}^{-3}$ | $x_{\text{EC}}$ | $\rho/\text{g cm}^{-3}$ |
| 0               | 1.07                    | 0                 | 1.18                    | 0               | 1.18                    |
| 0.123           | 1.11                    | 0.129             | 1.21                    | 0.128           | 1.21                    |
| 0.239           | 1.13                    | 0.248             | 1.24                    | 0.251           | 1.24                    |
| 0.356           | 1.16                    | 0.355             | 1.27                    | 0.361           | 1.26                    |
| 0.458           | 1.19                    | 0.476             | 1.29                    | 0.464           | 1.29                    |
| 0.564           | 1.22                    | 0.569             | 1.32                    | 0.562           | 1.31                    |
| 0.663           | 1.24                    | 0.672             | 1.34                    | 0.663           | 1.34                    |

Table S II: Viscosity,  $\eta/\text{mPa s}$ , of the solvent without solute and of the  $1.0 \text{ mol kg}^{-1}$   $\text{LiPF}_6$  and the LiFSA solution

|  |       | Solvent         |              |      |  |  |
|--|-------|-----------------|--------------|------|--|--|
|  |       | $x_{\text{EC}}$ | $T/\text{K}$ |      |  |  |
|  |       |                 | 288          | 298  |  |  |
|  | 0     |                 | 0.83         | 0.57 |  |  |
|  | 0.122 |                 | 1.00         | 0.75 |  |  |
|  | 0.238 |                 | 1.12         | 0.82 |  |  |
|  | 0.352 |                 | 1.28         | 1.01 |  |  |
|  | 0.460 |                 | 1.47         | 1.16 |  |  |
|  | 0.551 |                 | 1.74         | 1.36 |  |  |
|  | 0.656 |                 | 1.88         | 1.52 |  |  |

Viscosity at  $T/\text{K} > 298$  is so low and out-of-range of the equipment that we were not able to measure.

|                 |       | $\text{LiPF}_6$ |      |      |      |      | LiFSA           |      |              |      |      |      |
|-----------------|-------|-----------------|------|------|------|------|-----------------|------|--------------|------|------|------|
| $x_{\text{EC}}$ |       | $T/\text{K}$    |      |      |      |      | $x_{\text{EC}}$ |      | $T/\text{K}$ |      |      |      |
|                 |       | 288             | 298  | 308  | 318  | 328  |                 | 288  | 298          | 308  | 318  | 328  |
|                 | 0     | 2.03            | 1.60 | 1.26 | 0.67 | 0.54 | 0               | 2.01 | 1.55         | 1.24 | 0.68 | 0.58 |
|                 | 0.129 | 2.59            | 2.03 | 1.65 | 1.15 | 0.82 | 0.128           | 2.44 | 1.96         | 1.62 | 1.19 | 0.91 |
|                 | 0.248 | 3.40            | 2.68 | 2.20 | 1.72 | 1.50 | 0.251           | 2.98 | 2.34         | 1.99 | 1.55 | 1.36 |
|                 | 0.355 | 4.06            | 3.26 | 2.65 | 2.07 | 1.77 | 0.361           | 3.81 | 3.08         | 2.59 | 2.07 | 1.76 |
|                 | 0.476 | 5.21            | 4.19 | 3.35 | 2.64 | 2.39 | 0.464           | 4.25 | 3.44         | 2.81 | 2.23 | 1.94 |
|                 | 0.569 | 6.23            | 4.98 | 4.02 | 3.15 | 2.72 | 0.562           | 4.97 | 4.08         | 3.29 | 2.67 | 2.20 |
|                 | 0.672 | 7.14            | 5.69 | 4.49 | 3.60 | 2.93 | 0.663           | 5.88 | 4.73         | 3.79 | 3.01 | 2.43 |

Table S III: Specific conductivity,  $\sigma/\text{mS cm}^{-1}$  of the  $1.0 \text{ mol kg}^{-1}$   $\text{LiPF}_6$  and LiFSA solution

|                 |       | $\text{LiPF}_6$ |      |      |      |      | LiFSA           |      |              |      |      |      |
|-----------------|-------|-----------------|------|------|------|------|-----------------|------|--------------|------|------|------|
| $x_{\text{EC}}$ |       | $T/\text{K}$    |      |      |      |      | $x_{\text{EC}}$ |      | $T/\text{K}$ |      |      |      |
|                 |       | 288             | 298  | 308  | 318  | 328  |                 | 288  | 298          | 308  | 318  | 328  |
|                 | 0     | 6.4             | 7.2  | 8.0  | 8.7  | 9.5  | 0               | 7.3  | 8.1          | 9.1  | 10.0 | 10.9 |
|                 | 0.129 | 8.8             | 10.2 | 11.6 | 13.1 | 14.5 | 0.128           | 9.6  | 11.1         | 12.5 | 14.1 | 15.6 |
|                 | 0.248 | 10.0            | 11.7 | 13.5 | 15.4 | 17.3 | 0.251           | 10.7 | 12.5         | 14.4 | 16.2 | 18.1 |
|                 | 0.355 | 10.1            | 12.1 | 14.2 | 16.4 | 18.6 | 0.361           | 10.9 | 12.8         | 14.9 | 17.0 | 19.1 |
|                 | 0.476 | 9.9             | 11.8 | 14.2 | 16.4 | 18.9 | 0.464           | 10.6 | 12.6         | 14.8 | 17.1 | 19.4 |
|                 | 0.569 | 9.1             | 11.2 | 13.6 | 16.2 | 18.7 | 0.562           | 10.0 | 12.1         | 14.3 | 16.7 | 19.1 |
|                 | 0.672 | 8.3             | 10.5 | 12.9 | 15.4 | 18.1 | 0.663           | 9.3  | 11.5         | 13.7 | 16.1 | 18.6 |

Table S IV: Diffusion coefficient,  $D/10^{-10} \text{ m}^2 \text{ s}^{-1}$  of  $\text{Li}^+$ ,  $\text{PF}_6^-$ ,  $\text{FSA}^-$ , EC and DMC at  $T/\text{K} = 298$  measured by PGSE-NMR

|                 |                 |                              |      |      |                 |                 |                  |      |      | Solvent           |      |      |  |  |       |  |  |  |  |
|-----------------|-----------------|------------------------------|------|------|-----------------|-----------------|------------------|------|------|-------------------|------|------|--|--|-------|--|--|--|--|
|                 |                 |                              |      |      |                 |                 |                  |      |      | $x_{\text{EC}}$   | EC   | DMC  |  |  |       |  |  |  |  |
|                 |                 |                              |      |      |                 |                 |                  |      |      | 0                 |      | 24.8 |  |  |       |  |  |  |  |
|                 |                 |                              |      |      |                 |                 |                  |      |      | 0.123             | 18.6 | 20.6 |  |  |       |  |  |  |  |
|                 |                 |                              |      |      |                 |                 |                  |      |      | 0.239             | 16.1 | 17.8 |  |  |       |  |  |  |  |
|                 |                 |                              |      |      |                 |                 |                  |      |      | 0.356             | 13.8 | 15.4 |  |  |       |  |  |  |  |
|                 |                 |                              |      |      |                 |                 |                  |      |      | 0.458             | 12.0 | 13.5 |  |  |       |  |  |  |  |
|                 |                 |                              |      |      |                 |                 |                  |      |      | 0.564             | 10.2 | 11.4 |  |  |       |  |  |  |  |
|                 |                 |                              |      |      |                 |                 |                  |      |      | 0.663             | 9.04 | 10.1 |  |  |       |  |  |  |  |
|                 |                 |                              |      |      |                 |                 |                  |      |      | LiPF <sub>6</sub> |      |      |  |  | LiFSA |  |  |  |  |
| $x_{\text{EC}}$ | Li <sup>+</sup> | PF <sub>6</sub> <sup>-</sup> | EC   | DMC  | $x_{\text{EC}}$ | Li <sup>+</sup> | FSA <sup>-</sup> | EC   | DMC  |                   |      |      |  |  |       |  |  |  |  |
| 0               | 3.76            | 4.43                         |      | 9.42 | 0               | 3.82            | 4.30             |      | 9.51 |                   |      |      |  |  |       |  |  |  |  |
| 0.129           | 3.10            | 3.96                         | 5.86 | 7.66 | 0.128           | 3.24            | 3.99             | 5.98 | 7.91 |                   |      |      |  |  |       |  |  |  |  |
| 0.248           | 2.58            | 3.49                         | 5.00 | 6.56 | 0.251           | 2.79            | 3.65             | 5.30 | 6.81 |                   |      |      |  |  |       |  |  |  |  |
| 0.355           | 2.25            | 3.17                         | 4.22 | 5.74 | 0.361           | 2.40            | 3.34             | 4.55 | 5.74 |                   |      |      |  |  |       |  |  |  |  |
| 0.476           | 1.85            | 2.76                         | 3.83 | 4.64 | 0.464           | 2.22            | 3.21             | 4.44 | 5.33 |                   |      |      |  |  |       |  |  |  |  |
| 0.569           | 1.72            | 2.64                         | 3.53 | 4.37 | 0.562           | 1.94            | 2.92             | 3.81 | 4.53 |                   |      |      |  |  |       |  |  |  |  |
| 0.672           | 1.41            | 2.29                         | 2.97 | 3.44 | 0.663           | 1.67            | 2.58             | 3.38 | 3.89 |                   |      |      |  |  |       |  |  |  |  |

Table S V: Fraction in the DMC of the *cis-trans* conformer of DMC,  $N_{\text{DMCct}}/(N_{\text{DMCct}} + N_{\text{DMCcc}})$ , in the solvent without solute

| $x_{\text{EC}}$ | $N_{\text{DMCct}}/(N_{\text{DMCct}} + N_{\text{DMCcc}})$ |
|-----------------|----------------------------------------------------------|
| 0               | 0.034                                                    |
| 0.124           | 0.042                                                    |
| 0.236           | 0.048                                                    |
| 0.351           | 0.052                                                    |
| 0.464           | 0.055                                                    |
| 0.559           | 0.057                                                    |
| 0.659           | 0.058                                                    |

Table S VI: Fraction in the DMC of the *cis-trans* conformer bound to  $\text{Li}^+$  (ct-Li), free *cis-trans* conformer (ct-0) and *cis-cis* conformer bound to  $\text{Li}^+$  (cc-Li). The free *cis-cis* conformer accounts for the balance.

| LiPF <sub>6</sub> |       |       |       | LiFSA           |       |       |       |
|-------------------|-------|-------|-------|-----------------|-------|-------|-------|
| $x_{\text{EC}}$   | ct-Li | ct-0  | cc-Li | $x_{\text{EC}}$ | ct-Li | ct-0  | cc-Li |
| 0                 | 0.068 | 0.036 | 0.191 | 0               | 0.066 | 0.037 | 0.173 |
| 0.129             | 0.073 | 0.033 | 0.193 | 0.128           | 0.070 | 0.033 | 0.180 |
| 0.248             | 0.066 | 0.033 | 0.194 | 0.251           | 0.056 | 0.033 | 0.177 |
| 0.355             | 0.048 | 0.039 | 0.198 | 0.361           | 0.033 | 0.036 | 0.186 |
| 0.476             | 0.041 | 0.040 | 0.194 | 0.464           | 0.03  | 0.037 | 0.175 |
| 0.569             | 0.036 | 0.039 | 0.192 | 0.562           | 0.027 | 0.037 | 0.184 |
| 0.672             | 0.03  | 0.039 | 0.186 | 0.663           | 0.027 | 0.037 | 0.185 |

Table S VII: Average solvation number,  $n_s$ , of  $\text{Li}^+$

| LiPF <sub>6</sub> |       |       |      | LiFSA           |       |       |      |
|-------------------|-------|-------|------|-----------------|-------|-------|------|
| $x_{\text{EC}}$   | DMCct | DMCcc | EC   | $x_{\text{EC}}$ | DMCct | DMCcc | EC   |
| 0                 | 0.76  | 2.12  | 0    | 0               | 0.73  | 1.92  | 0    |
| 0.129             | 0.71  | 1.89  | 0.82 | 0.128           | 0.68  | 1.75  | 0.82 |
| 0.248             | 0.56  | 1.64  | 1.43 | 0.251           | 0.47  | 1.48  | 1.36 |
| 0.355             | 0.35  | 1.43  | 1.73 | 0.361           | 0.23  | 1.32  | 1.69 |
| 0.476             | 0.24  | 1.14  | 2.10 | 0.464           | 0.18  | 1.04  | 2.00 |
| 0.569             | 0.18  | 0.93  | 2.34 | 0.562           | 0.13  | 0.89  | 2.27 |
| 0.672             | 0.11  | 0.69  | 2.61 | 0.663           | 0.10  | 0.70  | 2.50 |

## S 2 Raman spectroscopy

Fig. S 1(a) plots the fraction of the *cis-trans* (ct) conformer of DMC,  $N_{ct}/(N_{ct} + N_{cc})$ , in the solvent without solute determined by the Raman signal intensity and its energy difference from the *cis-cis* (cc) conformer,  $E_{ct} - E_{cc}$ . If we assume thermal equilibrium between the two conformers, the probability of DMC being in conformer, A (= cc or ct), is proportional to the Boltzmann factor  $\exp(-E_A/RT)$ , where  $E_A$  is the energy of conformer, A. The fraction of the ct-conformer is hence given by

$$\frac{N_{ct}}{N_{cc} + N_{ct}} = \frac{\exp\left(-\frac{E_{ct}}{RT}\right)}{\exp\left(-\frac{E_{cc}}{RT}\right) + \exp\left(-\frac{E_{ct}}{RT}\right)} \quad (\text{S1})$$

or by solving for  $E_{ct} - E_{cc}$ ,

$$E_{ct} - E_{cc} = RT \ln\left(\frac{N_{cc}}{N_{ct}}\right). \quad (\text{S2})$$

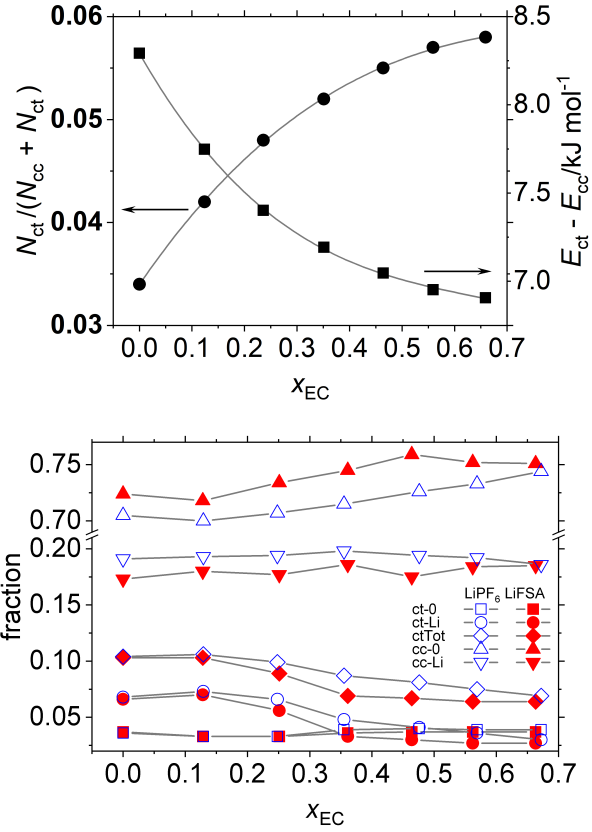

Figure S 1: (a) Fraction of ct-conformer of DMC,  $N_{ct}/(N_{cc} + N_{ct})$ , in the solvent without solute determined by the Raman signal intensity and the energy difference between two conformers,  $E_{ct} - E_{cc}$ , calculated based on Eq. (S2). (b) Fraction of each conformer in the  $1.0 \text{ mol kg}^{-1}$  LiPF<sub>6</sub> and LiFSA solution. ct-0: free ct-conformer, ct-Li: ct-conformer bound to Li<sup>+</sup>, ctTot: ct-0 + ct-Li, cc-0: free cc-conformer and cc-Li: cc-conformer bound to Li<sup>+</sup>.

Fig. S 2 plots the number of solvent molecules (EC and DMC) in the Li<sup>+</sup>-solvation shell in which one anion molecule (FSA<sup>-</sup> or PF<sub>6</sub><sup>-</sup>) is involved, under the assumption that free Li<sup>+</sup> dissociated from the anion is solvated by exactly four solvent molecules. The calculation is based on the average solvation number,  $n_s$ , in Fig. 3(a) and the degree of ionic dissociation,  $\alpha$ , in Fig. 8 in the main text.

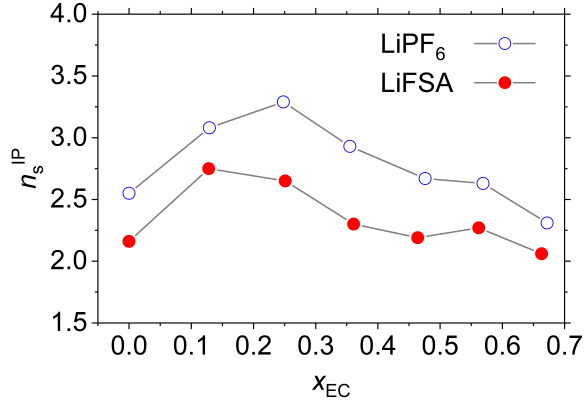

Figure S 2: Number of solvent molecules (EC+DMC) solvating one ion pair  $[Li^+ \cdot A^-]$  ( $A^- = PF_6^-$  or  $FSA^-$ ) by assuming that  $Li^+$  free from  $A^-$  is solvated by four solvent molecules. The fraction of ion pair in the system was calculated as  $(1 - \alpha)$  where  $\alpha$  is the degree of dissociation given in Fig. 8.

Fig. S 3 plots the free energy change,  $\Delta G$ , of the equilibrium

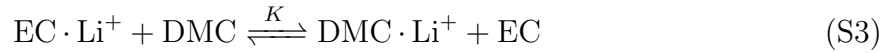

where  $EC \cdot Li^+$  and  $DMC \cdot Li^+$  represent EC and DMC solvating  $Li^+$ , respectively, of which the number is  $N_s$ , and EC and DMC for the solvent molecules free from  $Li^+$ , of which the number is  $N_f$ , is given by

$$\Delta G = -RT \ln K = -RT \ln \frac{N_{s,DMC} N_{f,EC}}{N_{s,EC} N_{f,DMC}}. \quad (S4)$$

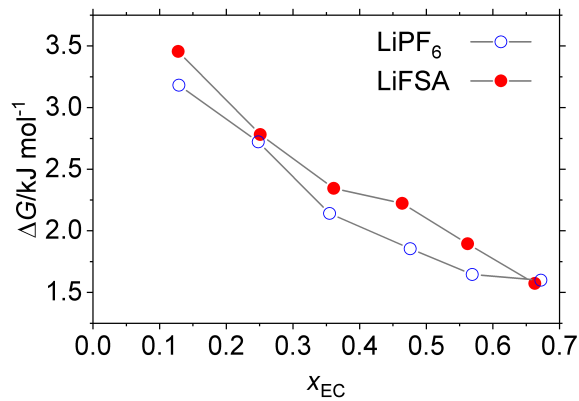

Figure S 3: Apparent free energy change,  $\Delta G$ , associated with the equilibrium (S3).

The EC-preference over DMC  $P_{\text{EC/DMC}}^{\text{B}}$  calculated from the data given by Bogle *et al.*<sup>6</sup> is shown in Fig. S 4. The data used are the number of carbonates molecules,  $N_{\text{EC}}$  and  $N_{\text{DMC}}$ , “associated with  $\text{Li}^+$ ” given in Table 1 of their article based on Eq. (S5)..

$$P_{\text{EC/DMC}}^{\text{B}} \equiv \frac{N_{\text{EC}}}{N_{\text{DMC}}} \cdot \frac{1 - x_{\text{EC}}}{x_{\text{EC}}}. \quad (\text{S5})$$

The numbers,  $N_{\text{EC}}$  and  $N_{\text{DMC}}$ , determined in their study involve the solvent in the secondary solvation shell. This result suggests that DMC is more populated than EC in a greater solvation environment around  $\text{Li}^+$ .

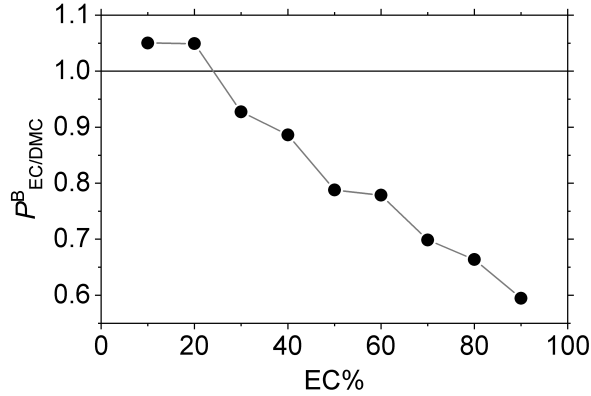

Figure S 4: EC-preference calculated from the data given in the  $^{17}\text{O}$  NMR study by Bolgole *et al.*<sup>6</sup> for the  $1 \text{ mol dm}^{-3}$   $\text{LiPF}_6$  in the EC/DMC system.

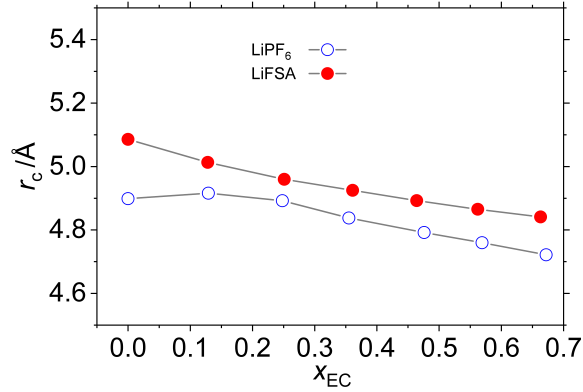

Figure S 5: Average radius of the  $\text{Li}^+$  coordinated by the solvent and anion,  $r_c$ , calculated from the average solvation number,  $n_s$ , and the molar volume of the solvents and anions,  $V_m$ , using Eq. (16).



### S 3 Apparent activation energy

Fig. S 6 plots the apparent activation energy,  $E_a$ , associated with the viscosity and conductivity calculated from their temperature dependency over  $288 \leq T/\text{K} \leq 338$  based on the Arrhenius relations

$$-\ln \eta = -\frac{E_a^\eta}{RT} + C_\eta \quad (\text{S6})$$

$$\ln \sigma = -\frac{E_a^\sigma}{RT} + C_\sigma, \quad (\text{S7})$$

where  $C_\eta$  and  $C_\sigma$  are constant.

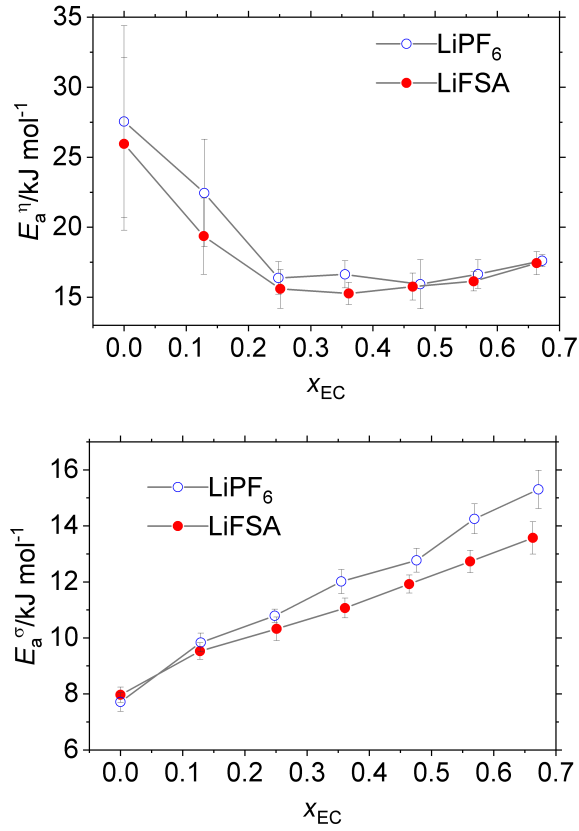

Figure S 6: Activation energy (a)  $E_a^\eta$  and (b)  $E_a^\sigma$  associated with viscosity and conductivity, respectively, from the temperature dependencies listed in Tables S II and S III, respectively. The error bars indicate twice the standard error  $\pm 2\sigma$  in the slope determined by the linear optimization based on Eqs. (S6) and (S7).

## S 4 PGSE NMR

As described in the Experimental sections, diffusion coefficient,  $D$ , was determined from the slope of the logarithmic relative spin-echo intensity  $\ln(M/M_0)$  by varying pulse width of the field gradient,  $\delta$ . Probed nuclides are  ${}^7\text{Li}$  for  $\text{Li}^+$ ,  ${}^{19}\text{F}$  for  $\text{PF}_6^-$  and  $\text{FSA}^-$ , and  ${}^1\text{H}$  for EC and DMC. An example is shown in Fig. S 7. The slopes of the lines give  $-D$ .

$$\ln\left(\frac{M}{M_0}\right) = -\left(\frac{\gamma\delta g}{\pi}\right)^2 (4\Delta - \delta) D \quad (\text{S8})$$

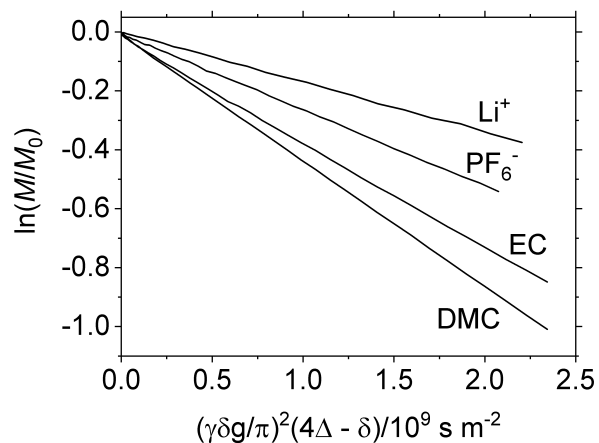

Figure S 7: Example of the relative spin-echo intensity,  $\ln(M/M_0)$ , as a function of  $(\gamma\delta g/\pi)^2(4\Delta - \delta)$ :  $\text{LiPF}_6$  at  $x_{\text{EC}} = 0.55$ .

## S 5 Stokes radius

$$r_{\text{St},\alpha} = \frac{kT}{c\pi\eta D_\alpha} \quad (\text{S9})$$

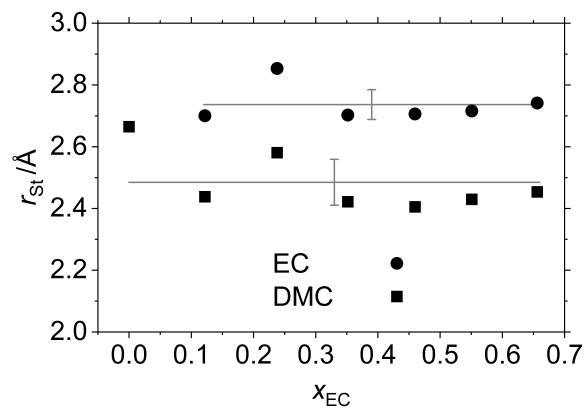

Figure S 8: Stokes radius of EC and DMC in solvent without solute calculated from the diffusion coefficient of each molecule and the solvent viscosity,  $\eta$ , based on Eq. (S9) where the shape factor is  $c = 3.5$ . The horizontal lines and vertical bars indicate the mean and twice the standard error, respectively.
